# Supplementary material
Source: Springer Nature journal article supplement (https://www.springermedizin.de/resource/supplementary/12936_2011_1746_MOESM4_ESM.pdf/9541598)
Supplement: MOESM4 [file 9541598]

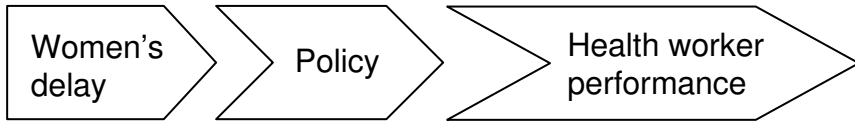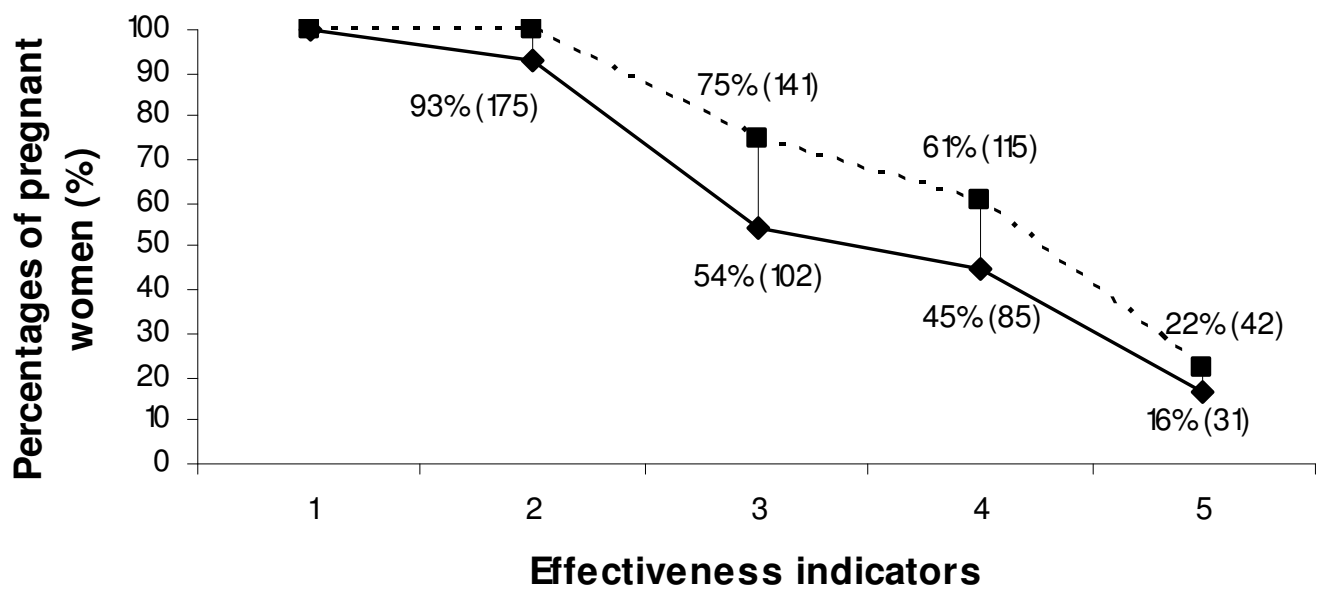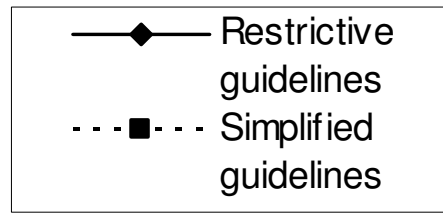

**Legend: Effectiveness indicators**

- 1) At least 2 ANC visits
- 2) ANC attendance initiated in time for IPTp
- 3) ANC visits timed for 2 IPTp doses
- 4) ANC visits timed for 2 IPTp doses and received 1 IPTp dose
- 5) ANC visits timed for 2 IPTp doses and received at least 2 IPTp doses
